# Supplementary material for: CASTIN: a system for comprehensive analysis of cancer-stromal interactome
Source: PubMed Central journal article supplement (PMC5103609; doi:10.1186/s12864-016-3207-z), 2016-11-09

# CASTIN viewer

Input File

 No file chosen

Threshold of signal strength

Search Genes(Gene Symbol)

View

## Cancer cell-ligand → Stromal receptor

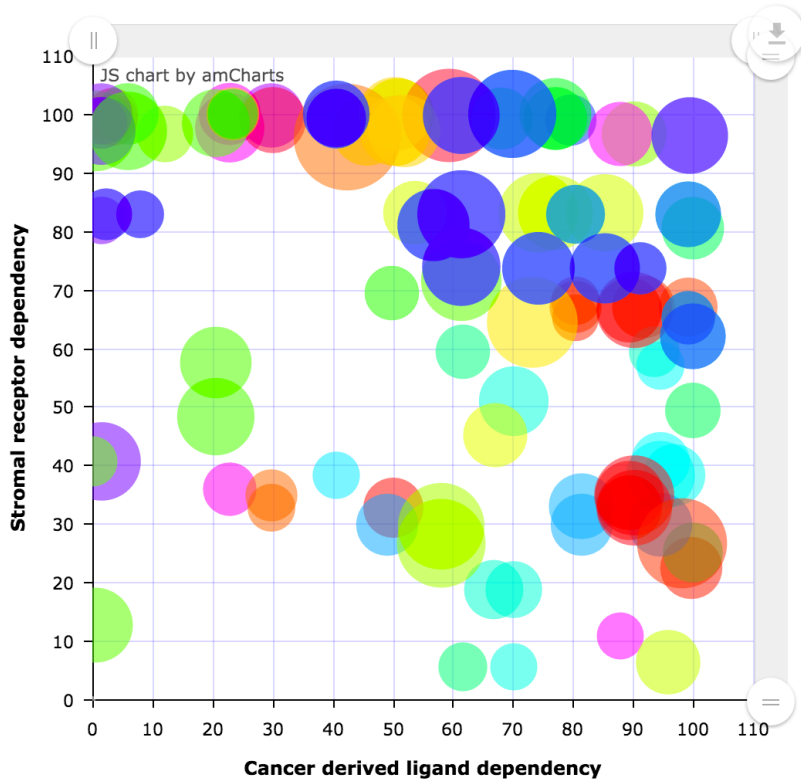

## Stromal ligand → Cancer cell-receptor

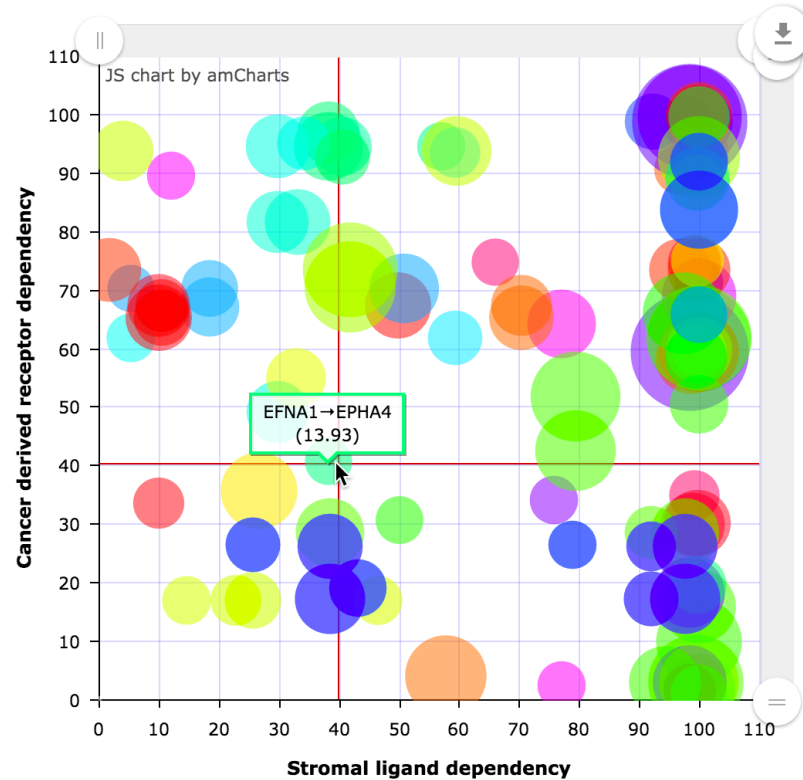

Supplement: 12864_2016_3207_MOESM3_ESM.pdf [file 12864_2016_3207_MOESM3_ESM.pdf]
