# Supplementary material for: CASTIN: a system for comprehensive analysis of cancer-stromal interactome
Source: PubMed Central journal article supplement (PMC5103609; doi:10.1186/s12864-016-3207-z), 2016-11-09
Supplement: 12864_2016_3207_MOESM4_ESM.pdf [file 12864_2016_3207_MOESM4_ESM.pdf]

**Supplementary Table 2. Summary statistics of RNA-seq for mixture c**

| <b>Sample</b> | <b>RNA ratio(mouse / human)</b> | <b>Total reads</b> | <b>Human reads</b> |
|---------------|---------------------------------|--------------------|--------------------|
| ExpID-523     | 75%                             | 39940114           | 6503840            |
| ExpID-524     | 50%                             | 38247984           | 11657362           |
| ExpID-525     | 25%                             | 37906700           | 17062833           |

**of total RNA from human (PANC-1) and mouse (SVEC4-10) cell lines**

| <b>Mouse reads</b> | <b>Mouse reads (%)</b> |
|--------------------|------------------------|
| 16031194           | 71.1%                  |
| 11120706           | 48.8%                  |
| 4584808            | 21.2%                  |
