# Supplementary material for: CASTIN: a system for comprehensive analysis of cancer-stromal interactome
Source: PubMed Central journal article supplement (PMC5103609; doi:10.1186/s12864-016-3207-z), 2016-11-09

a

Human (PANC-1)

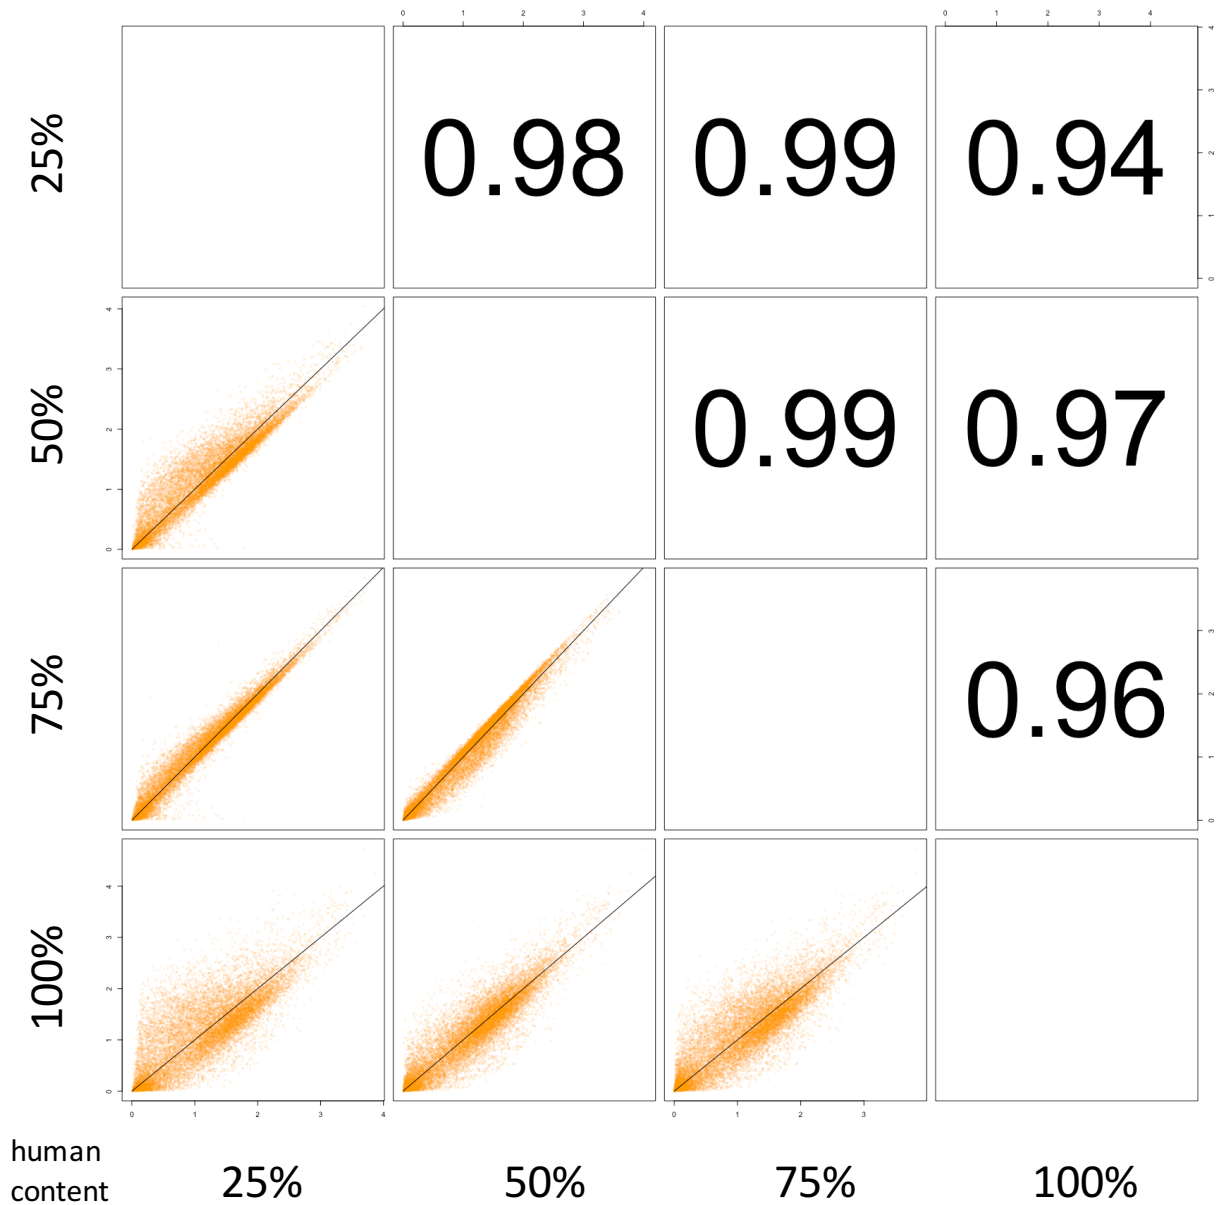

b

Mouse (SVEC4-10)

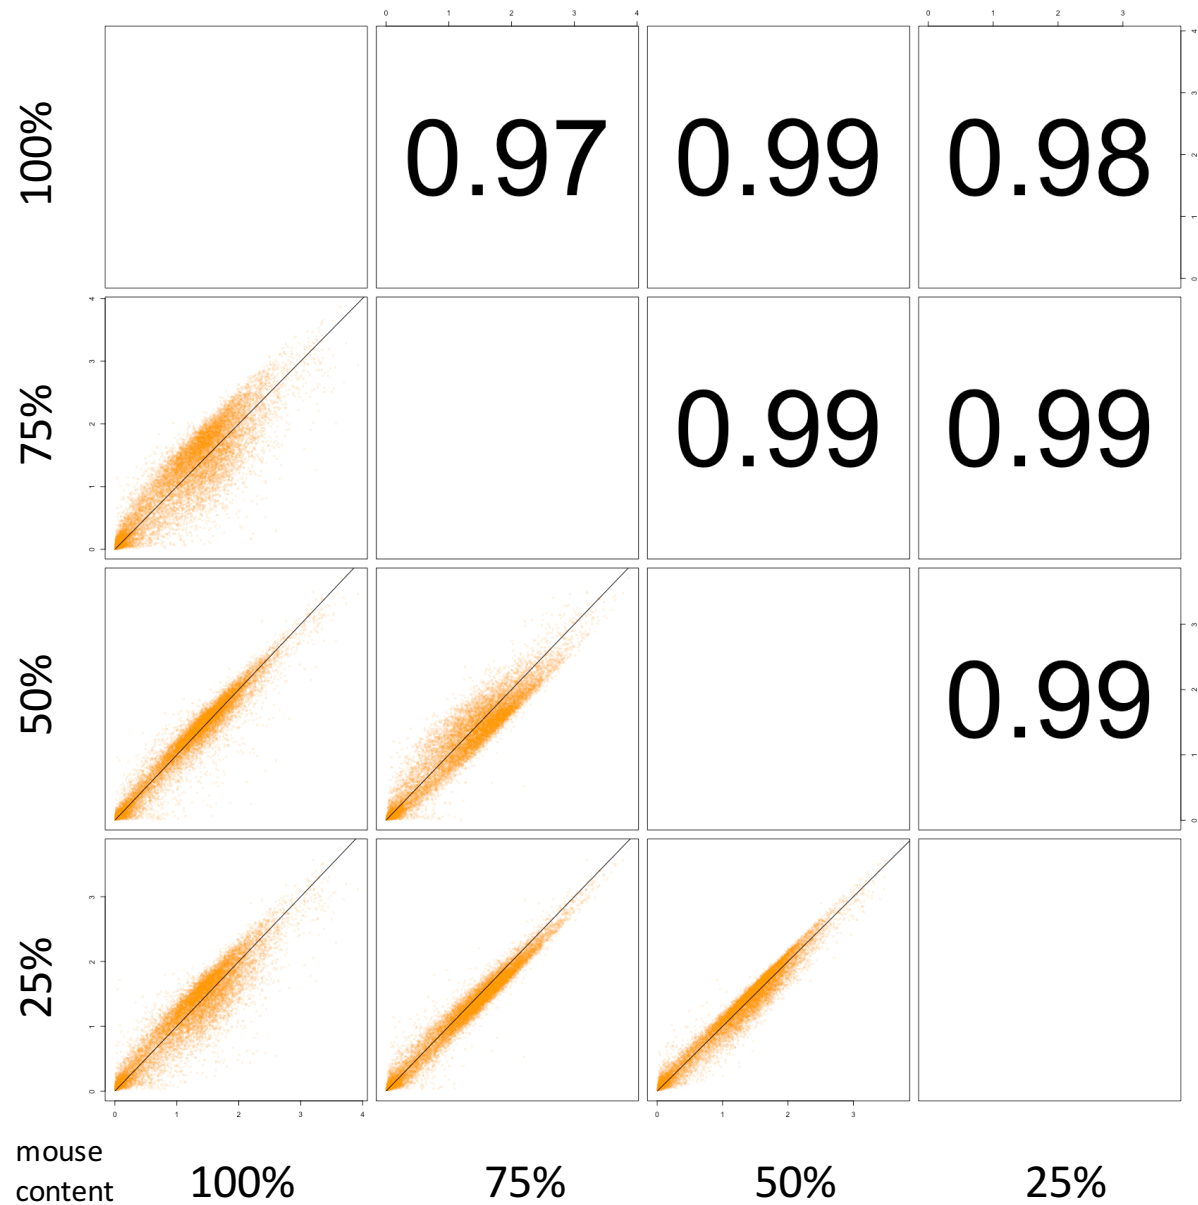

Supplement: 12864_2016_3207_MOESM5_ESM.pdf [file 12864_2016_3207_MOESM5_ESM.pdf]
