# Supplementary material for: CASTIN: a system for comprehensive analysis of cancer-stromal interactome
Source: PubMed Central journal article supplement (PMC5103609; doi:10.1186/s12864-016-3207-z), 2016-11-09

**a**Cancer cell-ligand -> Stromal receptor  
SHH=>PTCH1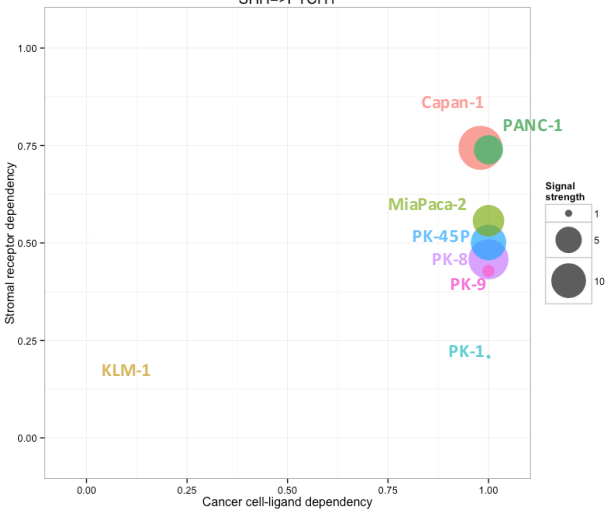**b**Cancer cell-ligand -> Stromal receptor  
IHH=>PTCH1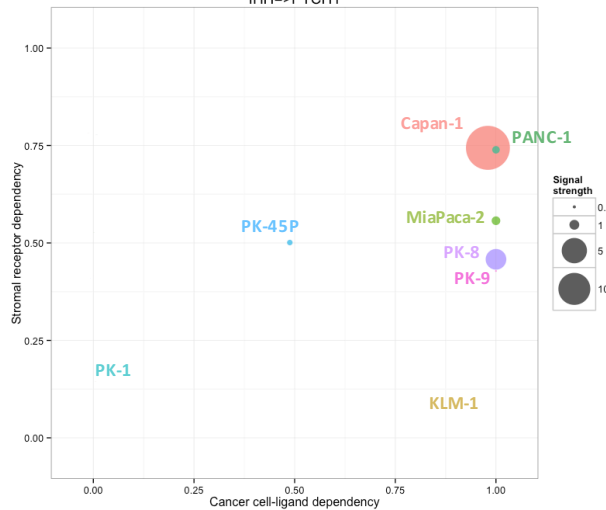**c**Cancer cell-ligand -> Stromal receptor  
IHH=>PTCH2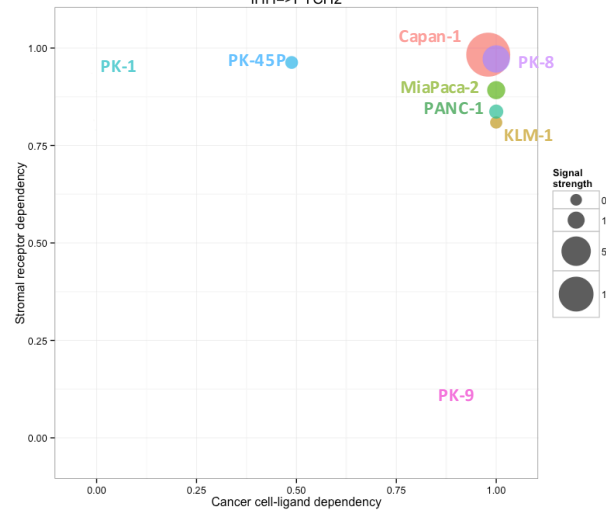

Supplement: 12864_2016_3207_MOESM7_ESM.pdf [file 12864_2016_3207_MOESM7_ESM.pdf]
