# Supplementary material for: CASTIN: a system for comprehensive analysis of cancer-stromal interactome
Source: PubMed Central journal article supplement (PMC5103609; doi:10.1186/s12864-016-3207-z), 2016-11-09

a

Cancer cell-ligand -> Stromal receptor  
SEMA3C=>NRP1

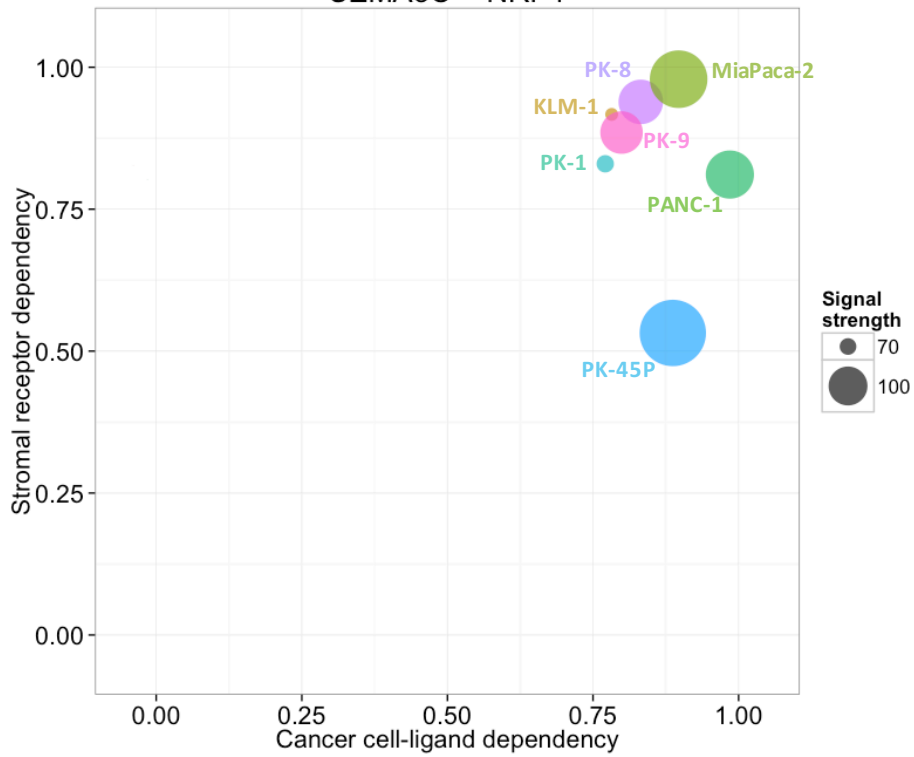

b

Stromal ligand -> Cancer cell-receptor  
SEMA4D=>PLXNB1

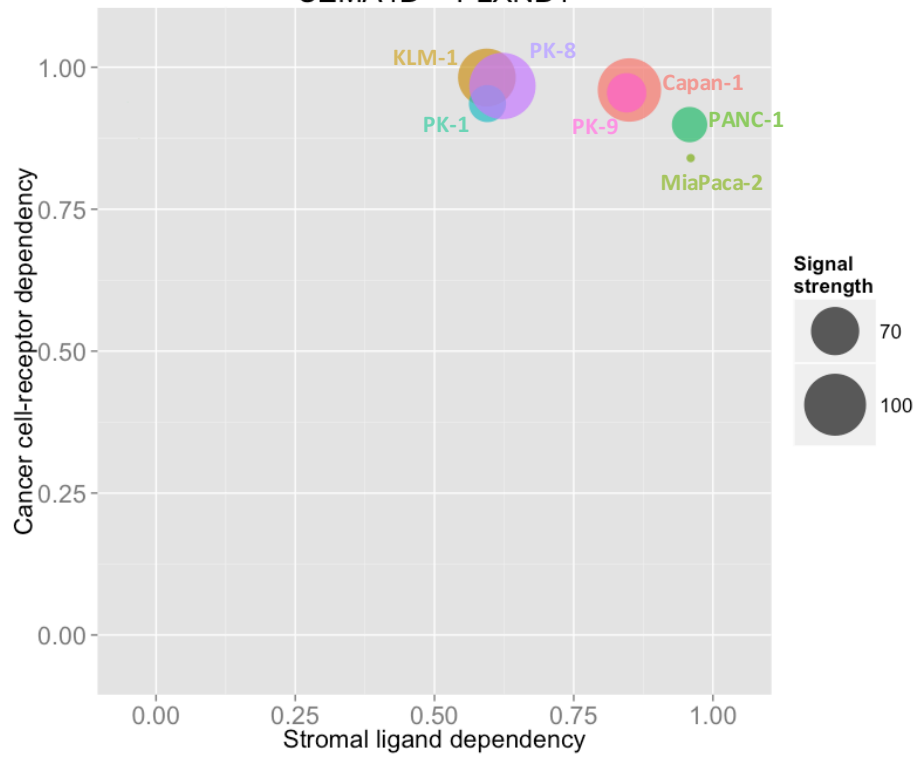

Supplement: 12864_2016_3207_MOESM8_ESM.pdf [file 12864_2016_3207_MOESM8_ESM.pdf]
